# Supplementary material for: Identification, Genome Sequencing, and Characterizations of Helicobacter pylori Sourced from Pakistan
Source: MDPI journal article supplement (doi:10.3390/microorganisms11112658), 2023-10-29
Supplement: s1 [file s1]

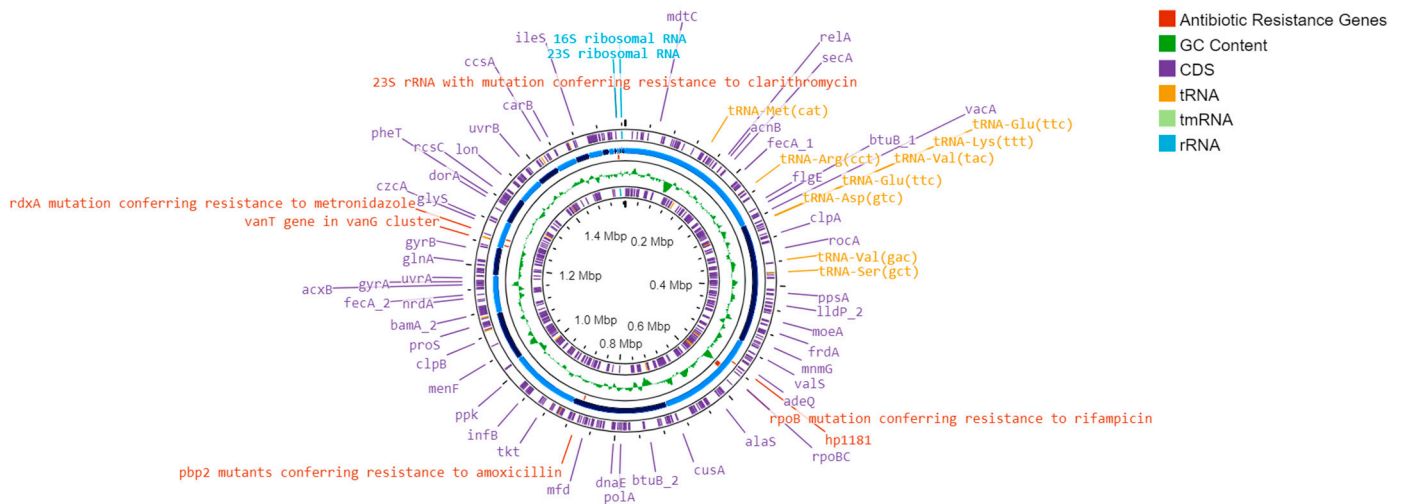

**Figure S1.** Circular genome of *H. pylori* strain HPA1 showing Antibiotic resistance genes and other major genetic features.

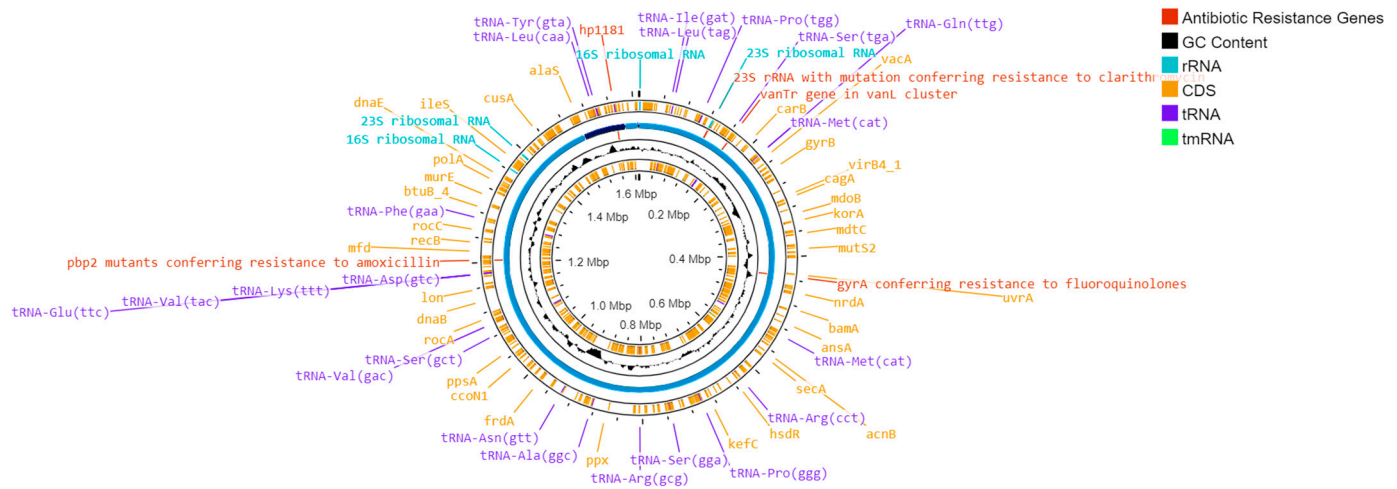

**Figure S2.** Circular genome of *H. pylori* strain HPA2 showing Antibiotic resistance genes and other major genetic features.

**Table S1.** Potential antibiotic resistant genes distributed in the five genome assemblies.

|                     |                                                                    | <i>H. pylori</i><br>HPA1 | <i>H. pylori</i><br>HPA2 | <i>H. pylori</i><br>HPAG1 | <i>H. pylori</i> hpfe074 |
|---------------------|--------------------------------------------------------------------|--------------------------|--------------------------|---------------------------|--------------------------|
| <b>Name of Gene</b> | <b>Product</b>                                                     | <b>Best Identities</b>   | <b>Best Identities</b>   | <b>Best Identities</b>    | <b>Best Identities</b>   |
| Iso-tRNA            | Isoleucyl-tRNA synthetase                                          | 98.17                    | 98.73                    | 91.71                     | 98.17                    |
| gidB                | 16S rRNA (guanine(527)-N(7))-methyltransferase                     | 100                      | 100                      | 100                       | 100                      |
| CmeDEF              | Multidrug efflux system                                            | 100                      | 100                      | 94.74                     | 97.7                     |
| CmeDEF              | Multidrug efflux system                                            | 99.52                    | 99.42                    | 99.74                     | 98.81                    |
| S10p                | SSU ribosomal protein S10p                                         | 99.52                    | 98.39                    | 99.95                     | 99.09                    |
| gyrA                | DNA gyrase subunit A                                               | 99.48                    | 99.95                    | 98.25                     | 99.25                    |
| S12p                | SSU ribosomal protein S12p                                         | 97.89                    | 98.54                    | 99.05                     | 94.05                    |
| Ddl                 | D-alanine--D-alanine ligase                                        | 99.27                    | 93.43                    | 99.09                     | 97.86                    |
| inhA, fabI          | Enoyl-[acyl-carrier-protein] reductase                             | 99.8                     | 99.61                    | 99.46                     | 97.12                    |
| 7a-HSDH             | Enoyl-[acyl-carrier-protein] reductase                             | 83.61                    | 99.74                    | 97.84                     | 91.45                    |
| CmeDEF              | Multidrug efflux system, lipoprotein                               | 99.8                     | 99.52                    | 98.45                     | 96.67                    |
| Alr                 | Alanine racemase                                                   | 99.74                    | 98.22                    | 96.98                     | 91.99                    |
| kasA                | 3-oxoacyl-[acyl-carrier-protein] synthase, KASII                   | 99.9                     | 99.63                    | 97.78                     | 98.15                    |
| gyrB                | DNA gyrase subunit B                                               | 94.45                    | 95.25                    | 94.27                     | 97.86                    |
| EF-G                | Translation elongation factor G                                    | 99.07                    | 99.43                    | 100                       | 99.1                     |
| PgsA                | CDP-diacylglycerol--glycerol-3-phosphate 3-phosphatidyltransferase | 98.8                     | 96.52                    | 98.56                     | 98.45                    |
| rho                 | Transcription termination factor Rho                               | 100                      | 100                      | 100                       | 94.67                    |
| EF-Tu               | Translation elongation factor Tu                                   | 97.9                     | 98.63                    | 99.78                     | 98.58                    |
| MurA                | UDP-N-acetylglucosamine 1-carboxyvinyltransferase                  | 97.56                    | 95.25                    | 91.27                     | 94.67                    |
| dxr                 | 1-deoxy-D-xylulose 5-phosphate reductoisomerase                    | 99.77                    | 98.43                    | 99.56                     | 94.58                    |
